# Supplementary material
Source: Research Square preprint supplement (doi:10.21203/rs.3.rs-9829206/v1)
Supplement: Supplementary file 1 [file 2ae79982a35c23c8415efc6c.xlsx]

## Sheet: SupplementaryTable3
site	model1	model0	metric	estimate	conf.low	conf.high	p.value
prostate	clinical + PRS	clinical	Sn	0.171223	0.0102448	0.36625	0.023023
prostate	clinical + PRS	clinical	LR+	3.42446	0.204897	7.325
prostate	clinical + PRS	clinical	LR-	-0.180235	-0.385526	-0.0107841
prostate	clinical + PRS	clinical	PPV	0.0297282	0.00129057	0.0677597
prostate	clinical + PRS	clinical	NPV	0.0021072	8.39886e-05	0.00477107
prostate	clinical + PRS	clinical	net benefit	0.00199496	7.95202e-05	0.00452825
pancreas	clinical + PRS	clinical	Sn	0.0528814	0.00319332	0.105094	0.017982
pancreas	clinical + PRS	clinical	LR+	1.05763	0.0638665	2.10187
pancreas	clinical + PRS	clinical	LR-	-0.0556647	-0.110625	-0.00336139
pancreas	clinical + PRS	clinical	PPV	0.0106074	0.000526106	0.0214792
pancreas	clinical + PRS	clinical	NPV	0.000636643	3.01155e-05	0.00128485
pancreas	clinical + PRS	clinical	net benefit	0.000608042	2.89196e-05	0.00123294
breast	clinical + PRS	clinical	Sn	0.102127	0.0169196	0.190587	0.00799201
breast	clinical + PRS	clinical	LR+	2.04253	0.338391	3.81175
breast	clinical + PRS	clinical	LR-	-0.107502	-0.200618	-0.0178101
breast	clinical + PRS	clinical	PPV	0.0291871	0.00446193	0.0563823
breast	clinical + PRS	clinical	NPV	0.00186232	0.000284187	0.00379723
breast	clinical + PRS	clinical	net benefit	0.00178405	0.000273243	0.0036461

## Sheet: SupplementaryTable4
site	model	term	estimate	conf.low	conf.high	p
all cancers	clinical + PRS	(Intercept)	-2.45563	-2.95286	-1.96015	0
all cancers	clinical + PRS	age	0.114644	-0.0813405	0.316122	0.2495
all cancers	clinical + PRS	sex (female)	-0.0792414	-0.431945	0.296724	0.669
all cancers	clinical + PRS	BMI	-0.0228793	-0.200386	0.152502	0.8205
all cancers	clinical + PRS	smoking (unknown)	0.122176	-0.663447	0.826977	0.7365
all cancers	clinical + PRS	smoking (Yes)	-0.104873	-0.454489	0.262565	0.5575
all cancers	clinical + PRS	cancer Hx	0.231556	-0.152425	0.615867	0.262
all cancers	clinical + PRS	cancer family Hx	0.278989	-0.0801935	0.630848	0.1205
all cancers	clinical + PRS	pain	0.0879874	-0.312954	0.470043	0.636
all cancers	clinical + PRS	fatigue	-0.71304	-1.15276	-0.290748	0.001
all cancers	clinical + PRS	nausea	0.424837	0.0391673	0.821156	0.0335
all cancers	clinical + PRS	weight loss	-0.411356	-0.790264	-0.0451771	0.0295
all cancers	clinical + PRS	CRP	0.326557	0.157675	0.493182	0
all cancers	clinical + PRS	albumin	-0.0747704	-0.284248	0.137644	0.5
all cancers	clinical + PRS	calcium	0.123357	-0.041316	0.281868	0.1355
all cancers	clinical + PRS	monocytes	0.236955	0.0684703	0.413503	0.005
all cancers	clinical + PRS	platelets	-0.0663531	-0.25737	0.114775	0.4785
all cancers	clinical + PRS	lymphocytes	0.00270487	-0.187102	0.171693	0.9655
all cancers	clinical + PRS	mean cell Hb	-0.166053	-0.354955	0.0238015	0.0835
all cancers	clinical + PRS	alkaline phosphatase	0.390464	0.233577	0.570317	0
all cancers	clinical + PRS	ovarian cancer PRS	0.0198348	-0.15164	0.192449	0.843
all cancers	clinical + PRS	breast cancer PRS	0.0788579	-0.0986936	0.256601	0.3915
all cancers	clinical + PRS	prostate cancer PRS	0.130236	-0.0478307	0.308241	0.1485
all cancers	clinical + PRS	pancreatic cancer PRS	0.174457	0.00289834	0.350254	0.0445
all cancers	clinical + PRS	melanoma PRS	0.0486938	-0.126932	0.227126	0.583
all cancers	clinical + PRS	lung cancer PRS	0.0112843	-0.167437	0.188156	0.9005
all cancers	clinical + PRS	colorectal cancer PRS	0.0351732	-0.130683	0.199866	0.6915
all cancers with PRS	clinical + PRS	(Intercept)	-4.01964	-4.77887	-3.28426	0
all cancers with PRS	clinical + PRS	age	0.142869	-0.13939	0.443744	0.3295
all cancers with PRS	clinical + PRS	sex (female)	0.191013	-0.319064	0.727365	0.457
all cancers with PRS	clinical + PRS	BMI	-0.0597142	-0.322544	0.195512	0.653
all cancers with PRS	clinical + PRS	smoking (unknown)	0.342091	-0.754428	1.29692	0.4705
all cancers with PRS	clinical + PRS	smoking (Yes)	0.0870686	-0.420466	0.593304	0.73
all cancers with PRS	clinical + PRS	cancer Hx	0.387726	-0.149614	0.918757	0.152
all cancers with PRS	clinical + PRS	cancer family Hx	0.48152	0.00226133	0.986154	0.0495
all cancers with PRS	clinical + PRS	pain	0.385959	-0.136808	0.907907	0.1555
all cancers with PRS	clinical + PRS	fatigue	-0.484124	-1.07895	0.0683076	0.082
all cancers with PRS	clinical + PRS	nausea	0.138604	-0.410817	0.6766	0.623
all cancers with PRS	clinical + PRS	weight loss	-0.0981812	-0.615052	0.409987	0.719
all cancers with PRS	clinical + PRS	CRP	0.278905	0.0588802	0.491757	0.0115
all cancers with PRS	clinical + PRS	albumin	-0.15171	-0.443659	0.136365	0.313
all cancers with PRS	clinical + PRS	calcium	-0.0442279	-0.299183	0.189591	0.716
all cancers with PRS	clinical + PRS	monocytes	0.205432	-0.0518406	0.45595	0.1095
all cancers with PRS	clinical + PRS	platelets	-0.211352	-0.478297	0.0426777	0.1055
all cancers with PRS	clinical + PRS	lymphocytes	0.0726111	-0.153906	0.279429	0.499
all cancers with PRS	clinical + PRS	mean cell Hb	-0.236368	-0.482211	0.00840698	0.06
all cancers with PRS	clinical + PRS	alkaline phosphatase	0.391384	0.227319	0.568699	0
all cancers with PRS	clinical + PRS	ovarian cancer PRS	-0.00431276	-0.245644	0.237839	0.97
all cancers with PRS	clinical + PRS	breast cancer PRS	0.150169	-0.0888598	0.389942	0.235
all cancers with PRS	clinical + PRS	prostate cancer PRS	0.24526	-0.00303481	0.49165	0.0525
all cancers with PRS	clinical + PRS	pancreatic cancer PRS	0.285907	0.049835	0.510195	0.017
all cancers with PRS	clinical + PRS	melanoma PRS	-0.06396	-0.307238	0.184625	0.619
all cancers with PRS	clinical + PRS	lung cancer PRS	0.00869219	-0.238901	0.262301	0.944
all cancers with PRS	clinical + PRS	colorectal cancer PRS	0.00876852	-0.221431	0.248125	0.9525
breast	clinical + PRS	(Intercept)	-6.09069	-7.89248	-4.4592	0
breast	clinical + PRS	age	0.100354	-0.536439	0.754599	0.768
breast	clinical + PRS	BMI	-0.21981	-0.880608	0.385737	0.505
breast	clinical + PRS	smoking (unknown)	-3.57984	-15.9706	0.59001	0.1645
breast	clinical + PRS	smoking (Yes)	0.310364	-0.790313	1.459	0.592
breast	clinical + PRS	cancer Hx	0.851206	-0.264243	1.98787	0.127
breast	clinical + PRS	cancer family Hx	0.951949	-0.214561	2.23555	0.105
breast	clinical + PRS	pain	0.768322	-0.439585	1.94735	0.203
breast	clinical + PRS	fatigue	-0.864007	-2.38673	0.453714	0.208
breast	clinical + PRS	nausea	-0.845202	-2.60637	0.558757	0.253
breast	clinical + PRS	weight loss	-1.00008	-2.23561	0.183374	0.098
breast	clinical + PRS	CRP	-0.376285	-1.64746	0.483729	0.534
breast	clinical + PRS	albumin	-0.115392	-0.739018	0.515197	0.693
breast	clinical + PRS	calcium	0.129794	-0.476366	0.700914	0.658
breast	clinical + PRS	monocytes	0.0349163	-0.577813	0.629197	0.9
breast	clinical + PRS	platelets	-1.15091	-2.06947	-0.332512	0.0035
breast	clinical + PRS	lymphocytes	0.0644493	-0.527652	0.583946	0.79
breast	clinical + PRS	mean cell Hb	-0.246665	-0.86522	0.3546	0.465
breast	clinical + PRS	alkaline phosphatase	0.573891	0.30216	0.877506	0
breast	clinical + PRS	breast cancer PRS	1.14583	0.54195	1.78843	0.0005
prostate	clinical + PRS	(Intercept)	-8.5049	-11.9254	-5.46294	0
prostate	clinical + PRS	age	1.05936	-0.23753	2.48091	0.1045
prostate	clinical + PRS	BMI	0.856073	-0.106064	1.77508	0.09
prostate	clinical + PRS	smoking (unknown)	-1.82826	-12.898	2.80643	0.6905
prostate	clinical + PRS	smoking (Yes)	-0.0295535	-1.88627	1.86798	0.966
prostate	clinical + PRS	cancer Hx	-0.755439	-3.22685	1.38188	0.526
prostate	clinical + PRS	cancer family Hx	0.761004	-1.08913	2.68975	0.402
prostate	clinical + PRS	pain	-1.51112	-5.27555	1.07834	0.318
prostate	clinical + PRS	fatigue	-1.91047	-5.90714	0.914454	0.236
prostate	clinical + PRS	nausea	-4.06507	-11.3271	0.132348	0.0665
prostate	clinical + PRS	weight loss	0.743362	-1.39406	3.11216	0.512
prostate	clinical + PRS	CRP	-0.72268	-2.73128	0.811795	0.433
prostate	clinical + PRS	albumin	-0.370888	-1.64627	0.834758	0.5645
prostate	clinical + PRS	calcium	-0.464309	-1.40302	0.532733	0.342
prostate	clinical + PRS	monocytes	-1.26292	-2.93556	0.153814	0.082
prostate	clinical + PRS	platelets	0.488738	-0.544934	1.46247	0.325
prostate	clinical + PRS	lymphocytes	0.531268	-0.0618463	1.17702	0.079
prostate	clinical + PRS	mean cell Hb	-0.0661094	-0.951805	0.828679	0.8755
prostate	clinical + PRS	alkaline phosphatase	-0.599022	-2.21371	0.696228	0.4195
prostate	clinical + PRS	PSA	1.85029	1.03646	2.81763	0
prostate	clinical + PRS	prostate cancer PRS	1.30943	0.320564	2.40832	0.009
bowel	clinical + PRS	(Intercept)	-6.32308	-8.2182	-4.57917	0
bowel	clinical + PRS	age	0.356671	-0.3857	1.1462	0.3725
bowel	clinical + PRS	sex (female)	-0.318705	-1.51839	0.872692	0.591
bowel	clinical + PRS	BMI	0.161886	-0.423446	0.724547	0.565
bowel	clinical + PRS	smoking (unknown)	0.591695	-1.45446	2.51561	0.555
bowel	clinical + PRS	smoking (Yes)	-0.173306	-1.41234	1.08895	0.778
bowel	clinical + PRS	cancer Hx	0.406183	-0.889706	1.67957	0.5215
bowel	clinical + PRS	cancer family Hx	0.103321	-1.06287	1.21847	0.853
bowel	clinical + PRS	pain	0.588787	-0.697061	1.82503	0.36
bowel	clinical + PRS	fatigue	-1.37102	-3.11279	0.0384121	0.0565
bowel	clinical + PRS	nausea	-0.523873	-2.23332	0.862718	0.519
bowel	clinical + PRS	weight loss	-0.948616	-2.19663	0.244919	0.1315
bowel	clinical + PRS	CRP	0.430521	0.0696022	0.787297	0.021
bowel	clinical + PRS	albumin	-0.286056	-0.917624	0.367215	0.3725
bowel	clinical + PRS	calcium	-0.433193	-1.03015	0.124888	0.127
bowel	clinical + PRS	monocytes	0.596248	0.138591	1.0375	0.012
bowel	clinical + PRS	platelets	0.0556724	-0.441058	0.512268	0.796
bowel	clinical + PRS	lymphocytes	0.25985	-0.208232	0.663786	0.2625
bowel	clinical + PRS	mean cell Hb	-0.472421	-1.0027	0.075292	0.085
bowel	clinical + PRS	alkaline phosphatase	0.111948	-0.222931	0.351512	0.412
bowel	clinical + PRS	FIT +	2.13365	0.546482	3.74365	0.0105
bowel	clinical + PRS	FIT (unknown)	0.3137	-0.956991	1.62496	0.624
bowel	clinical + PRS	colorectal cancer PRS	0.030099	-0.588365	0.657868	0.9235
pancreas	clinical + PRS	(Intercept)	-7.21005	-9.14816	-5.50092	0
pancreas	clinical + PRS	age	0.0734931	-0.519134	0.691395	0.824
pancreas	clinical + PRS	sex (female)	0.192108	-0.824096	1.26728	0.7305
pancreas	clinical + PRS	BMI	-0.206584	-0.775338	0.324364	0.4805
pancreas	clinical + PRS	smoking (unknown)	0.11076	-2.21229	2.00266	0.856
pancreas	clinical + PRS	smoking (Yes)	-0.156817	-1.16902	0.860349	0.75
pancreas	clinical + PRS	cancer Hx	0.0743697	-1.17089	1.20375	0.8655
pancreas	clinical + PRS	cancer family Hx	0.310792	-0.654728	1.26733	0.5315
pancreas	clinical + PRS	pain	0.816724	-0.236877	1.87324	0.1235
pancreas	clinical + PRS	fatigue	-0.0447679	-1.06563	0.91642	0.957
pancreas	clinical + PRS	nausea	1.78479	0.742042	2.85962	0.001
pancreas	clinical + PRS	weight loss	0.480152	-0.574211	1.59184	0.365
pancreas	clinical + PRS	CRP	0.601544	0.235099	0.968696	0.0035
pancreas	clinical + PRS	albumin	0.322186	-0.236863	0.912829	0.2725
pancreas	clinical + PRS	calcium	0.064744	-0.429179	0.519479	0.78
pancreas	clinical + PRS	monocytes	0.350291	-0.136875	0.820245	0.1605
pancreas	clinical + PRS	platelets	-0.462043	-1.09886	0.124605	0.123
pancreas	clinical + PRS	lymphocytes	-0.33907	-0.994021	0.200992	0.25
pancreas	clinical + PRS	mean cell Hb	0.108743	-0.381422	0.579598	0.65
pancreas	clinical + PRS	alkaline phosphatase	0.303068	0.129065	0.497524	0.001
pancreas	clinical + PRS	pancreatic cancer PRS	0.70544	0.225537	1.18261	0.0045
lung	clinical + PRS	(Intercept)	-6.65847	-8.54058	-5.01876	0
lung	clinical + PRS	age	-0.228546	-0.759642	0.324981	0.407
lung	clinical + PRS	sex (female)	-0.00433813	-1.07548	1.02537	0.995
lung	clinical + PRS	BMI	-0.468103	-1.09282	0.10758	0.11
lung	clinical + PRS	smoking (unknown)	0.487762	-2.02842	2.59183	0.62
lung	clinical + PRS	smoking (Yes)	1.01435	-0.134832	2.31944	0.089
lung	clinical + PRS	cancer Hx	0.40271	-0.728908	1.46805	0.462
lung	clinical + PRS	cancer family Hx	0.255072	-0.725041	1.23724	0.617
lung	clinical + PRS	pain	0.262452	-0.870732	1.31769	0.609
lung	clinical + PRS	fatigue	-0.121051	-1.23397	0.88884	0.83
lung	clinical + PRS	nausea	0.0290709	-1.16236	1.05702	0.9165
lung	clinical + PRS	weight loss	0.531566	-0.566075	1.80534	0.3955
lung	clinical + PRS	CRP	-0.0785481	-0.637064	0.368488	0.8195
lung	clinical + PRS	albumin	-0.134683	-0.650378	0.405914	0.6035
lung	clinical + PRS	calcium	0.352148	-0.0955296	0.77172	0.123
lung	clinical + PRS	monocytes	0.24556	-0.248408	0.706545	0.3175
lung	clinical + PRS	platelets	-0.0952276	-0.624466	0.378416	0.7395
lung	clinical + PRS	lymphocytes	-0.129194	-0.693641	0.36815	0.662
lung	clinical + PRS	mean cell Hb	-0.0825392	-0.549241	0.396873	0.7465
lung	clinical + PRS	alkaline phosphatase	0.0937706	-0.193023	0.289908	0.3905
lung	clinical + PRS	lung cancer PRS	0.166508	-0.321444	0.647313	0.499

## Sheet: SupplementaryTable5
site	model1	model0	metric	estimate	conf.low	conf.high	p.value
prostate	clinical + PRS	clinical	Sn	0.0610916	-0.15797	0.295093	0.292462
prostate	clinical + PRS	clinical	LR+	1.22183	-3.1594	5.90187
prostate	clinical + PRS	clinical	LR-	-0.064307	-0.310624	0.166284
prostate	clinical + PRS	clinical	PPV	0.0103681	-0.0218671	0.0492855
prostate	clinical + PRS	clinical	NPV	0.000792682	-0.00160122	0.00382921
prostate	clinical + PRS	clinical	net benefit	0.000778558	-0.00151364	0.00364643
pancreas	clinical + PRS	clinical	Sn	0.055198	0.0137143	0.109723	0.003998
pancreas	clinical + PRS	clinical	LR+	1.10396	0.274286	2.19446
pancreas	clinical + PRS	clinical	LR-	-0.0581031	-0.115498	-0.0144361
pancreas	clinical + PRS	clinical	PPV	0.0111753	0.00234035	0.0226753
pancreas	clinical + PRS	clinical	NPV	0.000679415	0.000138638	0.00142031
pancreas	clinical + PRS	clinical	net benefit	0.00063645	0.000149289	0.00125326
breast	clinical + PRS	clinical	Sn	0.222049	0.0369398	0.429733	0.00150376
breast	clinical + PRS	clinical	LR+	4.44098	0.738796	8.59466
breast	clinical + PRS	clinical	LR-	-0.233736	-0.45235	-0.038884
breast	clinical + PRS	clinical	PPV	0.0436181	0.00550906	0.0915963
breast	clinical + PRS	clinical	NPV	0.00243004	0.000288337	0.00541319
breast	clinical + PRS	clinical	net benefit	0.00239769	0.00038316	0.00513259

## Sheet: SupplementaryTable6
site	model	term	estimate	conf.low	conf.high	p
all cancers	clinical + PRS	(Intercept)	-2.51947	-3.10462	-1.95992	0
all cancers	clinical + PRS	age	0.129701	-0.116494	0.372193	0.29
all cancers	clinical + PRS	sex (female)	-0.26731	-0.709659	0.181049	0.2495
all cancers	clinical + PRS	BMI	-0.00396728	-0.227787	0.197382	1
all cancers	clinical + PRS	smoking (Unknown)	-0.35066	-1.57456	0.678497	0.5485
all cancers	clinical + PRS	smoking (Yes)	-0.134337	-0.566083	0.310323	0.5285
all cancers	clinical + PRS	cancer family Hx (Yes)	0.421146	0.00142309	0.851339	0.049
all cancers	clinical + PRS	pain	-0.111865	-0.582823	0.3484	0.639
all cancers	clinical + PRS	fatigue	-0.458438	-0.93662	-0.00072445	0.049
all cancers	clinical + PRS	nausea	0.37582	-0.0932876	0.823695	0.104
all cancers	clinical + PRS	weight loss	-0.394404	-0.861267	0.0712272	0.0925
all cancers	clinical + PRS	CRP	0.293996	0.0884324	0.499917	0.0035
all cancers	clinical + PRS	albumin	-0.151294	-0.400264	0.100343	0.244
all cancers	clinical + PRS	calcium	0.190389	-0.00337101	0.390509	0.053
all cancers	clinical + PRS	monocytes	0.272953	0.0746715	0.503448	0.005
all cancers	clinical + PRS	platelets	-0.0896354	-0.316578	0.124311	0.414
all cancers	clinical + PRS	lymphocytes	-0.070563	-0.292736	0.134462	0.546
all cancers	clinical + PRS	mean cell Hb	-0.249235	-0.462348	-0.0352629	0.0195
all cancers	clinical + PRS	alkaline phosphatase	0.35824	0.176817	0.569641	0
all cancers	clinical + PRS	ovarian cancer PRS	-0.00750844	-0.193604	0.183711	0.941
all cancers	clinical + PRS	breast cancer PRS	0.232814	0.0221631	0.443393	0.0245
all cancers	clinical + PRS	prostate cancer PRS	0.224681	0.0209826	0.429337	0.0335
all cancers	clinical + PRS	pancreatic cancer PRS	0.231932	0.0328262	0.433159	0.0245
all cancers	clinical + PRS	melanoma PRS	0.0295422	-0.178217	0.229291	0.772
all cancers	clinical + PRS	lung cancer PRS	-0.050541	-0.268179	0.162988	0.6625
all cancers	clinical + PRS	colorectal cancer PRS	-0.0133372	-0.221301	0.190474	0.895
all cancers with PRS	clinical + PRS	(Intercept)	-4.48994	-5.48721	-3.57182	0
all cancers with PRS	clinical + PRS	age	0.237109	-0.110686	0.599501	0.1905
all cancers with PRS	clinical + PRS	sex (female)	-0.0271931	-0.665917	0.606091	0.9235
all cancers with PRS	clinical + PRS	BMI	-0.0143772	-0.343795	0.284567	0.935
all cancers with PRS	clinical + PRS	smoking (Unknown)	-0.0460347	-1.77387	1.33473	0.9875
all cancers with PRS	clinical + PRS	smoking (Yes)	0.0273173	-0.60314	0.645598	0.928
all cancers with PRS	clinical + PRS	cancer family Hx (Yes)	0.629613	0.0224361	1.25741	0.0425
all cancers with PRS	clinical + PRS	pain	0.223828	-0.440604	0.865841	0.5035
all cancers with PRS	clinical + PRS	fatigue	-0.0158658	-0.658498	0.594361	0.971
all cancers with PRS	clinical + PRS	nausea	0.115855	-0.550005	0.771087	0.724
all cancers with PRS	clinical + PRS	weight loss	0.204591	-0.47082	0.880162	0.553
all cancers with PRS	clinical + PRS	CRP	0.250731	-0.0172034	0.510428	0.069
all cancers with PRS	clinical + PRS	albumin	-0.210547	-0.552772	0.131337	0.2425
all cancers with PRS	clinical + PRS	calcium	-0.0193504	-0.320145	0.268826	0.914
all cancers with PRS	clinical + PRS	monocytes	0.310092	-0.000453149	0.614213	0.0505
all cancers with PRS	clinical + PRS	platelets	-0.234779	-0.58521	0.0930616	0.166
all cancers with PRS	clinical + PRS	lymphocytes	0.0408846	-0.238587	0.276248	0.715
all cancers with PRS	clinical + PRS	mean cell Hb	-0.339418	-0.647896	-0.0327266	0.028
all cancers with PRS	clinical + PRS	alkaline phosphatase	0.394113	0.198275	0.610843	0
all cancers with PRS	clinical + PRS	ovarian cancer PRS	-0.110899	-0.40263	0.193249	0.4495
all cancers with PRS	clinical + PRS	breast cancer PRS	0.24886	-0.0565443	0.548777	0.1035
all cancers with PRS	clinical + PRS	prostate cancer PRS	0.421836	0.108656	0.726812	0.0085
all cancers with PRS	clinical + PRS	pancreatic cancer PRS	0.420312	0.14454	0.694196	0.0015
all cancers with PRS	clinical + PRS	melanoma PRS	-0.162054	-0.453547	0.131227	0.2775
all cancers with PRS	clinical + PRS	lung cancer PRS	-0.0315539	-0.339059	0.269633	0.845
all cancers with PRS	clinical + PRS	colorectal cancer PRS	-0.0983995	-0.395612	0.20374	0.53
breast	clinical + PRS	(Intercept)	-8.59496	-11.7176	-6.02106	0
breast	clinical + PRS	age	0.427102	-0.451546	1.38337	0.3385
breast	clinical + PRS	BMI	-0.11847	-1.08397	0.764277	0.811
breast	clinical + PRS	smoking (Unknown)	-1.86994	-11.4177	2.28149	0.623
breast	clinical + PRS	smoking (Yes)	0.899159	-0.658905	2.6051	0.263
breast	clinical + PRS	cancer family Hx (Yes)	1.10667	-0.508765	2.9321	0.188
breast	clinical + PRS	pain	0.830364	-0.762507	2.40134	0.2915
breast	clinical + PRS	fatigue	-0.499959	-2.35517	1.08694	0.5635
breast	clinical + PRS	nausea	-0.714601	-2.83236	1.03546	0.4615
breast	clinical + PRS	weight loss	-0.19181	-1.88259	1.59171	0.8295
breast	clinical + PRS	CRP	-2.81701	-7.44409	-0.0921183	0.0375
breast	clinical + PRS	albumin	-0.450029	-1.36143	0.466909	0.337
breast	clinical + PRS	calcium	0.451849	-0.269917	1.11113	0.216
breast	clinical + PRS	monocytes	0.296135	-0.537391	1.1122	0.478
breast	clinical + PRS	platelets	-1.33624	-2.53602	-0.262674	0.011
breast	clinical + PRS	lymphocytes	-0.322719	-1.185	0.486165	0.4755
breast	clinical + PRS	mean cell Hb	-0.280944	-1.07221	0.429285	0.46
breast	clinical + PRS	alkaline phosphatase	0.636019	0.196116	1.14475	0.003
breast	clinical + PRS	breast cancer PRS	1.46018	0.572246	2.39426	0
prostate	clinical + PRS	(Intercept)	-8.64551	-12.7511	-5.46325	0
prostate	clinical + PRS	age	0.625501	-0.70204	2.0767	0.3805
prostate	clinical + PRS	BMI	0.738161	-0.445535	1.83101	0.212
prostate	clinical + PRS	smoking (Unknown)	-1.83385	-13.2192	3.01902	0.657
prostate	clinical + PRS	smoking (Yes)	0.0227372	-2.0523	2.19395	0.994
prostate	clinical + PRS	cancer family Hx (Yes)	-0.495153	-2.84179	1.68024	0.6705
prostate	clinical + PRS	pain	-1.18434	-5.14062	1.6465	0.493
prostate	clinical + PRS	fatigue	-2.06191	-7.17836	1.13478	0.249
prostate	clinical + PRS	nausea	-2.77876	-9.74783	1.08517	0.231
prostate	clinical + PRS	weight loss	1.38467	-1.16957	4.69754	0.326
prostate	clinical + PRS	CRP	-1.48941	-5.28515	0.786805	0.2855
prostate	clinical + PRS	albumin	-0.193949	-1.69182	1.27545	0.7825
prostate	clinical + PRS	calcium	-0.0372795	-1.15725	1.12713	0.9395
prostate	clinical + PRS	monocytes	-1.19027	-2.90536	0.354932	0.1285
prostate	clinical + PRS	platelets	0.0722094	-1.51566	1.37861	0.8695
prostate	clinical + PRS	lymphocytes	0.65078	-0.0107564	1.37769	0.0535
prostate	clinical + PRS	mean cell Hb	-0.0603725	-1.33079	1.21802	0.929
prostate	clinical + PRS	alkaline phosphatase	-0.717727	-2.59403	0.753715	0.4365
prostate	clinical + PRS	PSA	2.2705	1.29266	3.45935	0
prostate	clinical + PRS	prostate cancer PRS	1.02146	-0.15158	2.22448	0.0955
bowel	clinical + PRS	(Intercept)	-6.40705	-8.67259	-4.41502	0
bowel	clinical + PRS	age	-0.0466515	-0.920438	0.832569	0.916
bowel	clinical + PRS	sex (female)	-0.404883	-1.88319	1.06644	0.588
bowel	clinical + PRS	BMI	0.243804	-0.444198	0.881972	0.46
bowel	clinical + PRS	smoking (Unknown)	0.492018	-2.11669	2.75376	0.6565
bowel	clinical + PRS	smoking (Yes)	-0.514915	-2.05462	0.963551	0.4875
bowel	clinical + PRS	cancer family Hx (Yes)	0.166191	-1.20381	1.56134	0.808
bowel	clinical + PRS	pain	0.918172	-0.627986	2.48967	0.231
bowel	clinical + PRS	fatigue	-1.67588	-4.02785	0.194257	0.084
bowel	clinical + PRS	nausea	-0.161371	-1.91354	1.37086	0.8875
bowel	clinical + PRS	weight loss	-0.763662	-2.26604	0.723046	0.3105
bowel	clinical + PRS	CRP	0.364276	-0.0977051	0.836356	0.121
bowel	clinical + PRS	albumin	-0.296261	-1.08082	0.476066	0.447
bowel	clinical + PRS	calcium	-0.414226	-1.14737	0.256032	0.246
bowel	clinical + PRS	monocytes	0.752113	0.197772	1.29811	0.0075
bowel	clinical + PRS	platelets	0.0487371	-0.575008	0.61266	0.8395
bowel	clinical + PRS	lymphocytes	0.0974677	-0.523669	0.593718	0.679
bowel	clinical + PRS	mean cell Hb	-0.502424	-1.13774	0.100488	0.107
bowel	clinical + PRS	alkaline phosphatase	0.156358	-0.208846	0.441852	0.324
bowel	clinical + PRS	FIT+	1.87731	-0.125747	3.88168	0.066
bowel	clinical + PRS	fit (Unknown)	-0.200621	-1.79812	1.38632	0.8035
bowel	clinical + PRS	colorectal cancer PRS	-0.290218	-1.01848	0.447592	0.435
pancreas	clinical + PRS	(Intercept)	-7.1797	-9.28127	-5.31071	0
pancreas	clinical + PRS	age	0.0840016	-0.555841	0.756037	0.8285
pancreas	clinical + PRS	sex (female)	-0.0338519	-1.23404	1.12681	0.96
pancreas	clinical + PRS	BMI	-0.262669	-0.966284	0.380343	0.46
pancreas	clinical + PRS	smoking (Unknown)	0.568064	-1.90159	2.68669	0.591
pancreas	clinical + PRS	smoking (Yes)	-0.0170288	-1.15738	1.10419	0.976
pancreas	clinical + PRS	cancer family Hx (Yes)	0.281882	-0.82893	1.40004	0.6095
pancreas	clinical + PRS	pain	0.810678	-0.380512	2.00258	0.175
pancreas	clinical + PRS	fatigue	0.522374	-0.536781	1.61228	0.333
pancreas	clinical + PRS	nausea	1.051	-0.119574	2.22121	0.079
pancreas	clinical + PRS	weight loss	0.44989	-0.707922	1.69048	0.4635
pancreas	clinical + PRS	CRP	0.643157	0.234621	1.0554	0.0025
pancreas	clinical + PRS	albumin	0.351844	-0.284575	0.996504	0.2855
pancreas	clinical + PRS	calcium	-0.033572	-0.630389	0.531855	0.93
pancreas	clinical + PRS	monocytes	0.332928	-0.247684	0.890404	0.2515
pancreas	clinical + PRS	platelets	-0.421935	-1.12462	0.209714	0.2025
pancreas	clinical + PRS	lymphocytes	-0.151613	-0.797677	0.363323	0.6625
pancreas	clinical + PRS	mean cell Hb	0.122358	-0.465977	0.671636	0.6515
pancreas	clinical + PRS	alkaline phosphatase	0.401691	0.177822	0.660073	0
pancreas	clinical + PRS	pancreatic cancer PRS	0.812222	0.283065	1.35012	0.003
lung	clinical + PRS	(Intercept)	-6.89094	-9.06844	-5.013	0
lung	clinical + PRS	age	-0.0832765	-0.720167	0.603784	0.779
lung	clinical + PRS	sex (female)	-0.19061	-1.40707	1.03138	0.7575
lung	clinical + PRS	BMI	-0.484299	-1.23624	0.168194	0.166
lung	clinical + PRS	smoking (Unknown)	-2.764	-15.9262	1.53239	0.413
lung	clinical + PRS	smoking (Yes)	0.910922	-0.422926	2.35177	0.177
lung	clinical + PRS	cancer family Hx (Yes)	0.859333	-0.307364	2.14835	0.1545
lung	clinical + PRS	pain	-0.437759	-1.9604	0.879246	0.576
lung	clinical + PRS	fatigue	0.346462	-0.889942	1.50817	0.554
lung	clinical + PRS	nausea	0.111533	-1.21291	1.37258	0.8485
lung	clinical + PRS	weight loss	0.304196	-0.986038	1.7519	0.68
lung	clinical + PRS	CRP	-0.238992	-0.901704	0.263502	0.4425
lung	clinical + PRS	albumin	-0.329832	-0.988892	0.317749	0.3145
lung	clinical + PRS	calcium	0.282219	-0.229883	0.770843	0.2615
lung	clinical + PRS	monocytes	0.336795	-0.225316	0.867978	0.234
lung	clinical + PRS	platelets	0.0178474	-0.580931	0.584392	0.9445
lung	clinical + PRS	lymphocytes	-0.477475	-1.2772	0.203946	0.18
lung	clinical + PRS	mean cell Hb	-0.381226	-0.952459	0.166075	0.163
lung	clinical + PRS	alkaline phosphatase	0.0250153	-0.305459	0.258141	0.7295
lung	clinical + PRS	lung cancer PRS	0.0304995	-0.558076	0.618351	0.929

## Sheet: SupplementaryTable7
disease	N	prevalence	estimate	statistic	conf.low	conf.high	p.value	fdr
Psoriasis	81	0.0502481	2.25993	6.69471	1.78555	2.88037	2.16103e-11	8.64412e-11
Rheumatoid arthritis	50	0.0316256	2.01335	4.70819	1.50842	2.70423	2.49932e-06	4.99864e-06
Coeliac disease	31	0.0198464	4.41096	6.96073	2.9455	6.82161	3.38506e-12	2.70805e-11
Ulcerative colitis	16	0.0103426	1.86252	2.44338	1.13389	3.0831	0.0145503	0.0166289
Type 1 diabetes mellitus	15	0.00970246	5.30579	5.49747	3.00114	9.97403	3.85269e-08	1.02738e-07
Crohn's disease	8	0.00519818	3.52274	3.36821	1.71953	7.55305	0.000756586	0.00121054
Multiple sclerosis	8	0.00519818	2.58047	2.60964	1.27587	5.34879	0.00906367	0.0120849
Systemic lupus erythematosus	6	0.00390371	2.46229	2.16069	1.09566	5.68406	0.0307195	0.0307195
