# Supplementary material
Source: Research Square preprint supplement (doi:10.21203/rs.3.rs-9829206/v1)
Supplement: Supplementary file 1 [file 637ba684f4d6d395107fa3aa.docx]

**Supplementary Table 1:** Overview of variables and missing values included in the multivariable analyses.

|  | variable | # missing | % missing |
| --- | --- | --- | --- |
| biomarkers | PSA (in males only) | 15 | 1.78 |
|  | CA125 (in females only) | 25 | 2.39 |
|  | FIT | 876 | 46.32 |
| blood tests | albumin | 27 | 1.43 |
|  | alkaline phosphatase | 28 | 1.48 |
|  | calcium | 69 | 3.65 |
|  | C reactive protein | 41 | 2.17 |
|  | HbA1c | 35 | 1.85 |
|  | lymphocytes | 36 | 1.90 |
|  | mean cell Hb | 35 | 1.85 |
|  | monocytes | 36 | 1.90 |
|  | platelets | 37 | 1.96 |
| symptoms | unexplained weight loss | 0 | 0 |
|  | persistent nausea or appetite loss | 0 | 0 |
|  | severe unexplained fatigue | 0 | 0 |
|  | new atypical pain | 0 | 0 |
| other | BMI | 126 | 6.66 |
|  | smoking | 7 | 0.37 |
|  | personal history of cancer | 0 | 0 |
|  | family history of cancer | 0 | 0 |
|  | age | 0 | 0 |
|  | sex | 0 | 0 |

**Supplementary Table 2:** Overview of cancer-specific multivariable models.

| Context | Model Name | Model Structure | Disease Type |
| --- | --- | --- | --- |
| cancer-specific | clinical | cancer status ~ age + BMI + smoking + Hx + FamHx + platelets + monocytes + lymphocytes + ALP + CRP + albumin + calcium + mean cell Hb + weight loss + fatigue + pain + nausea (+ sex) (+ PSA | CA125 | FIT) | breast, melanoma, pancreatic, lung, prostate, ovarian, colorectal cancer |
| clinical + PRS | clinical model + cancer-specific PRS |
| pan-cancer | clinical | cancer status ~ age + BMI + smoking + Hx + FamHx + platelets + monocytes + lymphocytes + ALP + CRP + albumin + calcium + mean cell Hb + weight loss + fatigue + pain + nausea + sex | all cancers combined  all cancers with PRS combined (breast, melanoma, pancreatic, lung, prostate, ovarian, colorectal cancer) |
| clinical + PRS | basic model + seven cancer-specific PRS |
