# Supplementary material
Source: Research Square preprint supplement (doi:10.21203/rs.3.rs-9829206/v1)
Supplement: Supplementary file 2 [file d81c4bba9fface1d312c7f3a.docx]

**Supplementary Figure 1:** Sensitivity analysis excluding individuals with a prior history of cancer. All analyses were repeated after excluding participants with any documented history of cancer. Incident cancer cases (cancer Dx) were compared exclusively with participants without cancer or cancer history (non-cancer), and no cancer-history covariate was included. (A) Distribution of cancer-specific polygenic risk scores (PRS) for seven cancer types comparing cancer Dx vs non-cancer groups in the restricted cohort. Boxes indicate median and interquartile range; whiskers denote 1.5x IQR. Statistical significance was assessed using two-tailed t-tests. (B) Sensitivity (detection rate) at a fixed specificity of 95% for clinical models with and without inclusion of cancer-specific PRS, shown by cancer site. (C-D) Positive (LR+) and negative (LR−) likelihood ratios at the same fixed-specificity threshold. (E-F) Positive predictive value (PPV) and negative predictive value (NPV) at the same threshold. (G-I) Decision curve analysis showing net clinical benefit across decision thresholds ranging from 1% to 10% for prostate (G), breast (H), and pancreatic (I) cancer, comparing the clinical model, clinical + PRS model, and reference strategies (“treat all” and “treat none”). All performance metrics and decision curves are based on leave-one-out cross-validated predictions.

**Supplementary Figure 2:** Integrated risk distribution and covariate contributions in sensitivity analyses excluding individuals with a prior history of cancer. Multivariable Bayesian logistic regression models were re-fitted after excluding all participants with any documented history of cancer. Incident cancer cases were compared exclusively with participants without cancer or cancer history, and no cancer-history covariate was included. For each model, the left-hand panels show the distribution of the integrated risk score (IRS) derived from the fitted models, and the right-hand panels summarise the estimated effect sizes of individual predictors on the log-odds scale with 95% credible intervals. Predictors are grouped by category: polygenic risk score (PRS), presenting symptoms, routine blood biomarkers, and other clinical or demographic variables. (A-E) Cancer-specific models for pancreatic (A), bowel (B), lung (C), breast (D), and prostate (E) cancer. (F) Pan-cancer model including all incident cancer diagnoses analysed jointly.
